# Supplementary material for: Highly selective optical monitoring of O2via multiple-channels
Source: Royal Society of Chemistry journal article supplement (doi:10.1039/c2ra22292b), 2012-11-13
Supplement: c2ra22292b.pdf [file c2ra22292b.pdf]

## Supporting Information

### Highly selective optical monitoring of O<sub>2</sub> via multiple-channels

Anup Kumar<sup>a</sup>, Rinkoo D. Gupta<sup>b</sup> and Tarkeshwar Gupta<sup>a\*</sup>

<sup>a</sup>Department of Chemistry, University of Delhi, New Delhi-110 007, India.

<sup>b</sup>Faculty of Life Sciences and Biotechnology, South Asian University, New Delhi-110 021,  
India.

*E-mail: tgupta@chemistry.du.ac.in*

## Experiment Section

**Materials and Methods.** All reactions involving air sensitive compounds were carried out under a N<sub>2</sub> atmosphere using Glove Box or schlenk line technique. All glassware was oven-dried at 120°C, evacuated and purged with N<sub>2</sub> gas for 15 min. Solvents were dried by standard methods before use. 2-amino-5-nitroanisole and PtO<sub>2</sub>.H<sub>2</sub>O (Adam's catalyst) was obtained from Sigma Aldrich and was used without further purification. Acetic anhydride (received from Department of Chemistry, University of Delhi) and pyridine were purchased from s. d. fine chemical Ltd (India). Catalytic hydrogenation was performed in a shaker type hydrogenator brought from Popular Traders (Hr). The high purity dinitrogen, argon, dioxygen, carbon dioxide, dihydrogen, methane, ethene and carbon mono-oxide gas cylinders were obtained from Sigma Gases and Services (Delhi). The exact volume measurement was performed using highly precise 1.0 litre and 500 ml round bottom flask (Schott Duran) and an airtight Hamilton syringe with the capacity from 50 to 2500 µl for required concentration of test gases in nitrogen. During the time of gas-estimation experiment, the cuvette was made air-tight using homemade rubber cork for the interference free detection. All <sup>1</sup>H NMR spectra were recorded on Jeol NMR ECX 400p spectrometer at room temperature using DMSO-d<sub>6</sub> and CDCl<sub>3</sub>. All chemical shifts (δ) are recorded in ppm with reference to TMS. IR spectra were taken on Perkin-Elmer FT-IR spectrophotometer in range 400-4000 cm<sup>-1</sup> using KBr as medium. UV-Vis spectroscopy experiments were carried out on JASCO UV-Vis-NIR spectrometer (670D) using quartz cuvettes (path length, 1cm, volume 3 mL). Fluorescence spectroscopy experiments were executed on Varian Cary eclipse fluorescence instrument, with a quartz cuvette (path length, 1 cm and slit width, 10 nm). CHI 660D electrochemical analyzer was used to carry out electrochemical measurements. Electrochemical workstation with a conventional three electrode configuration consisting of glassy carbon as working electrode, platinum wire as counter electrode and Ag/AgCl as reference electrode. The cyclic voltammetry (CV) measurements were carried out in CH<sub>3</sub>CN solutions of the compound (ca. 10<sup>-2</sup> M), and the concentration of the supporting electrolyte (TBAP) was maintained at 1.0 M. All of the potentials reported in this study were referenced against the Ag/AgCl electrode, which under the given experimental conditions gave a value of 370 (± 5 mV) for the ferrocene/ferrocinium couple (ΔE= 60 mV). The pH of the solution was maintained with Metrex digital pH-meter, which was calibrated with buffer solution of pH 4.00 and 9.00 before the experiments. De-oxygenation of the solutions was achieved by bubbling dinitrogen

for 15 min. Water used in the experiment was double distilled and degassed by purging N<sub>2</sub> for 15 min.

**Synthesis of 2-methoxy-1, 4 phenylene-diamine (2)**<sup>S1</sup>. 2-amino-5-nitroanisole (**1**) (5.52g, 0.0325 mmol) in 1, 4-dioxane (45 ml) was treated with PtO<sub>2</sub>.H<sub>2</sub>O (0.05g, 0.2 mmol). The mixture was stirred under hydrogen (3 bar) for 20 h. The catalyst was separated by filtration through celite under N<sub>2</sub>, subsequently solvent was evaporated to dryness. A light pinkish colour solid product was obtained, which was stored under inert atmosphere (Yield, 85%). <sup>1</sup>H NMR (400 MHz, DMSO-d<sub>6</sub>): δ/ppm 6.35 (d, *J* = 8.0 Hz, 1H), 6.17 (d, *J* = 2.2 Hz, 1H), 5.96 (dd, *J* = 2.2, 8.1 Hz, 1H), 4.25, 3.83 (br, s, 4H, NH<sub>2</sub>), 3.65 (s, 3H, OCH<sub>3</sub>). IR (KBr, cm<sup>-1</sup>): ν = 3478 (NH<sub>2</sub>), 3348 (NH<sub>2</sub>), 1626 (C=C<sub>Ar</sub>), 1268, 1232 (C-O-C). ES MS: m/z (%): 139 (100) [M + 1], 124 (55) [M-NH<sub>2</sub><sup>+</sup>], 108 (10) [M-2NH<sub>2</sub><sup>+</sup>]. UV-Vis (CH<sub>3</sub>CN; λ, nm; ε, M<sup>-1</sup> cm<sup>-1</sup>): 216 (107990), 248 (66571), 314 (28355). CV (vs Ag/AgCl): +0.32V, -0.20V.

**Synthesis of N, N'-Diacetyl-2-methoxy-1, 4-phenylenediamine (3)**<sup>S2</sup>. 2-methoxyphenylene-1, 4-diamine (5.0 g) was dissolved in dry pyridine (15 ml) and stirred slowly for 30 min, subsequently 20 ml of acetic anhydride was added drop wise and the resulting mixture was stirred for 3h. The resultant solution was cooled, poured onto ice, and the crude product collected by filtration. The crude product was purified by recrystallization from ethanol and stored in air (Yield, 60%). <sup>1</sup>H NMR (400 MHz, DMSO-d<sub>6</sub>): δ/ppm 8.34 (d, *J* = 8.2 Hz, 1H), 7.63 (d, *J* = 8.5 Hz, 2H), 7.22 (br, s, 1H), 6.5 (dd, *J* = 8.4, 2.0 Hz, 1H), 3.87 (s, 3H), 2.19 (s, 3H), 2.17(s, 3H). IR (KBr, cm<sup>-1</sup>): ν = 3304 (N-H), 1672 (C=O), 1626 (C=C<sub>Ar</sub>), 1298, 1252 (C-O-C). ES MS: m/z (%): 223 (100) [M + 1], 181 (82) [M-COCH<sub>3</sub><sup>+</sup>]. UV-Vis (CH<sub>3</sub>CN; λ, nm; ε, M<sup>-1</sup> cm<sup>-1</sup>): 231 (32704), 266 (64732), 293 (36535).

**Transformation of 3 into 2.** To a stirring solution of N, N'-Diacetyl-2-methoxy-1, 4-phenylenediamine (110 mg, 50 mmol) in ethylene glycol, 2.5 ml of conc. HCl was added drop wise until 15 min. The reaction mixture was refluxed and then extracted with ethyl acetate and double distilled degassed water (3×). The organic layer was dried over anhydrous Na<sub>2</sub>SO<sub>4</sub> and finally under vacuum (Yield, 65 %). The purity has been checked with <sup>1</sup>HNMR and Mass data. Notably, **2** is stable in degassed acetonitrile solution for at least more than 6 h and **3** is stable in open air for at least 1 months as judged by <sup>1</sup>HNMR and UV-Vis spectroscopy.

**Preparation of ppm level samples.** The ppm level concentration was maintained using a gas balloon fitted with vacuum septum for gas introduction into one litre R.B flask, equipped with two gas needles for gas inlet and outlet. The flask was filled with dinitrogen gas and 300  $\mu\text{l}$  of dioxygen was introduced through syringe via septum. Subsequently, gas mixture was mixed by sacking for  $\sim 10$  min and passed through the sample via inlet needle while keeping outlet needle open. Likewise, the lower ppm dioxygen gas sample was prepared by injecting the 50, 100, 150, 200, 250  $\mu\text{l}$  dioxygen gas in flask which is previously filled with one litre of dinitrogen.

**Sensing experiment with ppm level of  $\text{O}_2$ .** The acetonitrile solution of **2** ( $1 \times 10^{-5}$  M) was carefully degassed by purging  $\text{N}_2$  for 30 min in air-tight cuvette, subsequently, 50 ppm concentration of  $\text{O}_2$  in  $\text{N}_2$  was passed through the solution of **2** for 10 min. Thereof the UV/Vis and Fluorescence spectra were recorded. Similarly,  $\text{O}_2$  sensing experiment with other concentrations was carried out.

**Selectivity experiment with test gases.** The reactivity of **2** was tested with other gases including  $\text{CO}$ ,  $\text{CO}_2$ ,  $\text{C}_2\text{H}_4$ ,  $\text{CH}_4$ ,  $\text{Ar}$ ,  $\text{N}_2$ ,  $\text{H}_2$ , Air and  $\text{O}_2$ . In one set of experiment, 300 ppm of  $\text{O}_2$  in each test gases were passed through solution of **2** for 10 min before recording UV-Vis and Fluorescence spectra. In another set of experiment, pure test gases were passed through acetonitrile solution of **2** for 10 min. Notably, both experiments were performed using afresh acetonitrile solution of **2** ( $1 \times 10^{-5}$  M), which was degassed with pure  $\text{N}_2$  for 15-30 min.

**pH dependent  $\text{O}_2$  sensing experiment.** The pH of the solution was maintained using 0.01 M HCl and 0.01 M NaOH in ethanol. A number of solutions of **2** were made having pH = 1.0, 3.0, 4.0, 5.0, 6.0, 7.0, 8.0, 9.0 and 10.0. The  $\text{O}_2$  sensing experiment in each pH solution was carried out by passing 300 ppm of  $\text{O}_2$  in  $\text{N}_2$  for 10 min. Notably, both experiments were performed using afresh acetonitrile solution of **2** ( $1 \times 10^{-5}$  M), which was degassed with pure  $\text{N}_2$  for 15-30 min.

**Monitoring of  $\text{O}_2$  using test paper.** A strip of whatman paper was purged with  $\text{N}_2$  and then, dipped in  $10^{-3}$  M acetonitrile solution of **2** and dried under  $\text{N}_2$  gas. The resulting test strip was exposed with 100 ppm  $\text{O}_2$  for 10 min. Subsequently, new test strip was taken and purged with 200 ppm  $\text{O}_2$  for 10 min. Similarly, experiment was preceded by exposing with higher concentration of  $\text{O}_2$  for 10 min using different test strip and data are presented in Fig. S4.

**Stability Test under UV-radiation.** The acetonitrile solution of **2** ( $0.5 \times 10^{-5} \text{M}$ ) was prepared and kept under UV-radiation chamber (356 nm, 15 watt) for 5 min. Then, UV-Vis spectra was run to observe the resulting changes. After that, same solution was again kept in UV chamber for 10, 20, 30 min to check the stability under UV-radiation (see Figure S5).

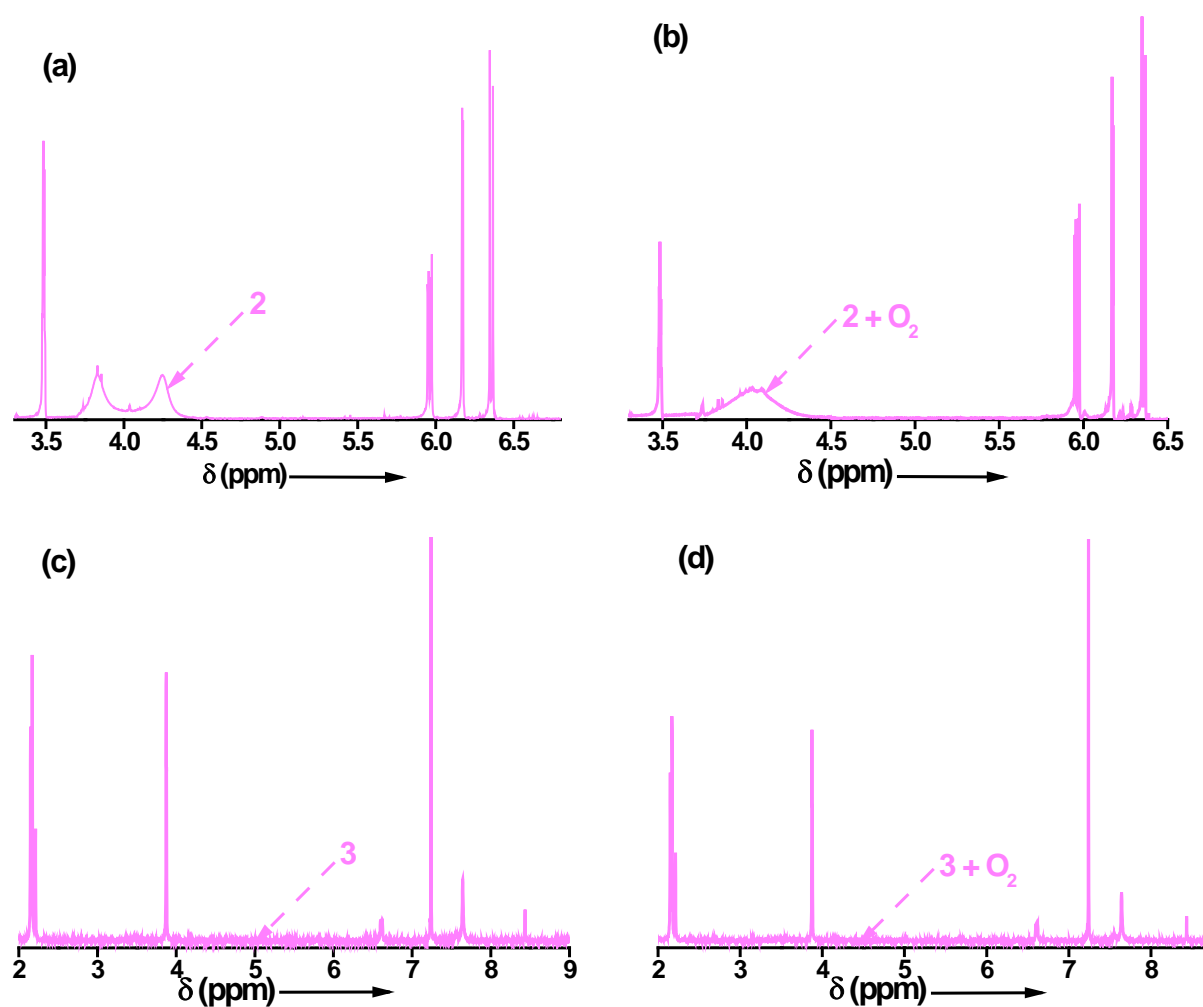

**Figure S1.**  $^1\text{H}$ NMR spectra of **2** (a), **2** upon exposure of  $\text{O}_2$  (300 ppm) for 10 min (b), **3** (c) and **3** upon exposure of pure  $\text{O}_2$  for 10 min (d) in  $\text{DMSO-d}_6$  solution.

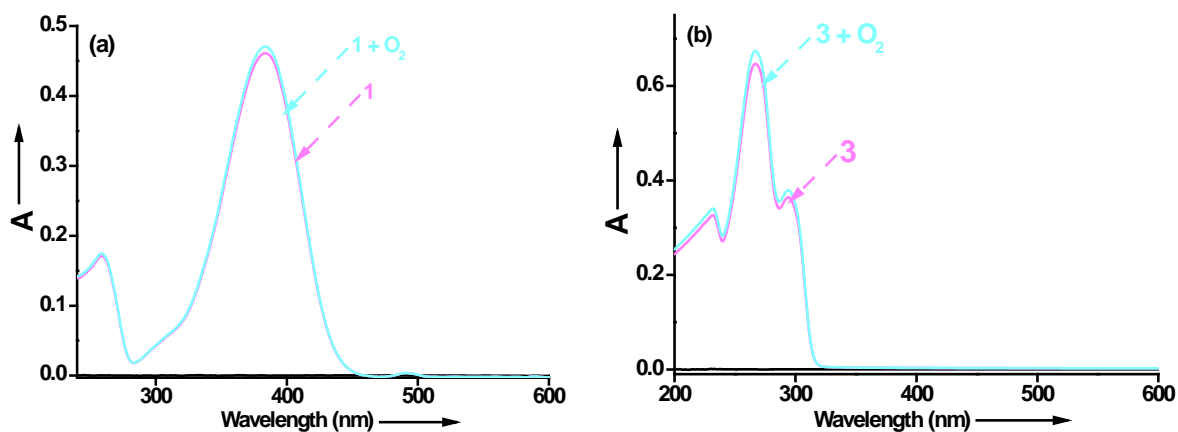

**Figure S2.** (a) UV-Vis spectra of **1** (pink line) and **1** + O<sub>2</sub> (blue line, pure O<sub>2</sub> for 10 min), (b) UV-Vis spectra of **3** (pink line) and **3** + O<sub>2</sub> (blue line, pure O<sub>2</sub> for 10 min).

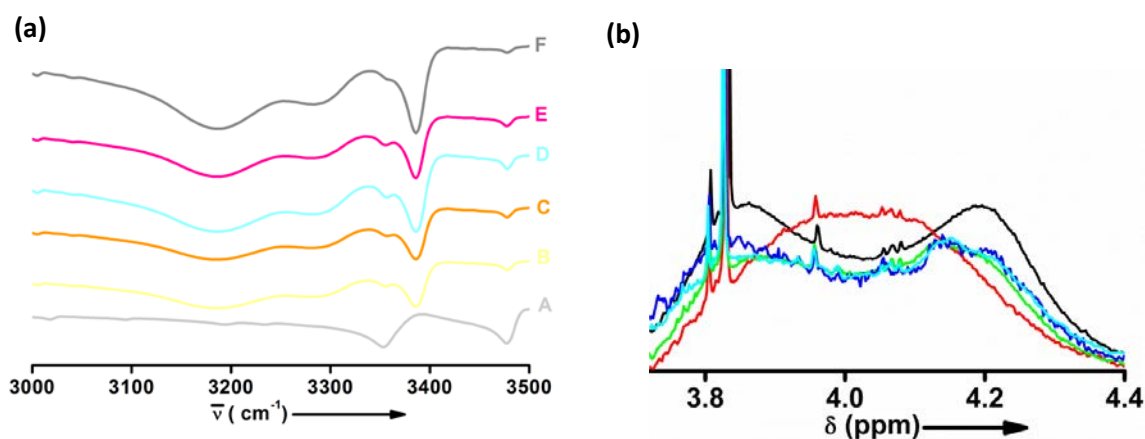

**Figure S3.** (a) Change in IR spectra of **2** (A, grey) after addition of various concentration of O<sub>2</sub> ranging from 50ppm (B, yellow), 100ppm (C, orange), 150ppm (D, blue), 200ppm (E, pink), 250ppm (F, dark grey). (b) <sup>1</sup>H NMR spectra of **2** after exposing with different concentration of O<sub>2</sub> in N<sub>2</sub> for 10 min. 0 ppm (black spectra), 50 ppm (blue spectra), 100 ppm (cyan spectra), 200 ppm green spectra, 300 ppm (red spectra).

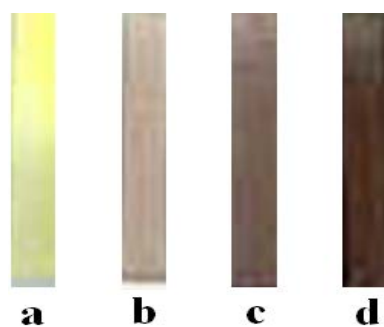

**Figure S4.** Change in colour of the test paper dyed with **2** after exposing with N<sub>2</sub> (a), 100 ppm of O<sub>2</sub> (b), 200 ppm of O<sub>2</sub> (c), 300 ppm of O<sub>2</sub> (d) for 10 min.

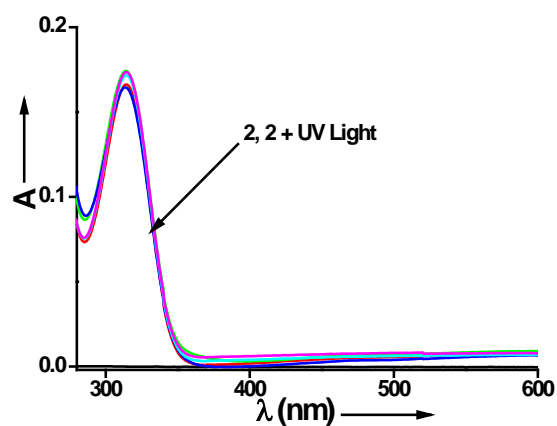

**Figure S5.** Representative UV-Vis spectra of **2** ( $0.5 \times 10^{-5}$  M in acetonitrile, blue line) and spectra after irradiating the **2** with UVlight for 5 min (red line), 10 min (green line), 20 min (cyan line), 30 min (magenta line).

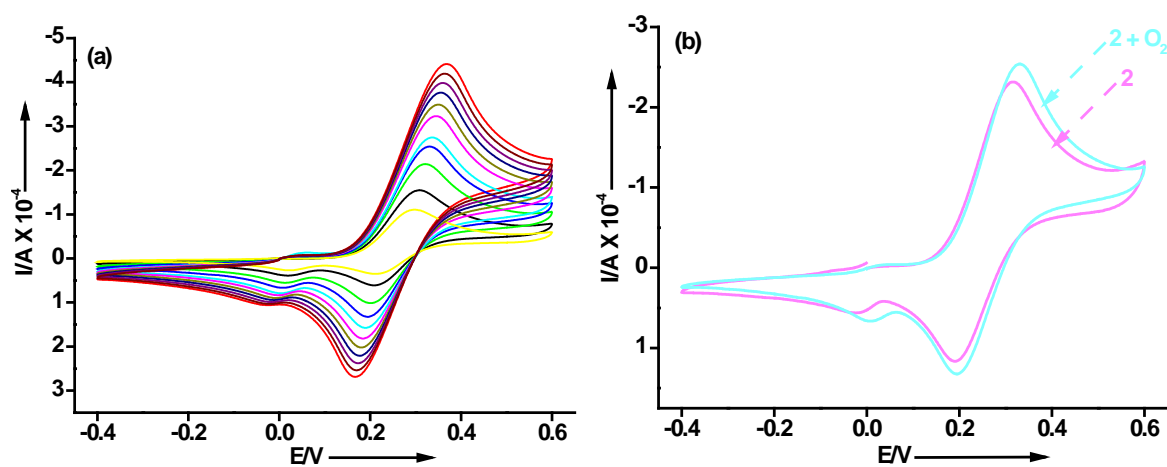

**Figure S6.** (a) Cyclic voltammograms of **2** ( $10^{-2}$  M) in acetonitrile containing 1.0 M  $\text{Bu}_4\text{NClO}_4$  at scan rate from 100 to 1000 mV. The glassy carbon was used as working electrode, platinum wire was used as counter electrode, and Ag/AgCl in 1.0 M KCl aqueous solution was used as reference electrode (b) Comparative spectra of **2** and **2** after passing pure  $\text{O}_2$ . Scan rate =  $300 \text{ mVs}^{-1}$ .

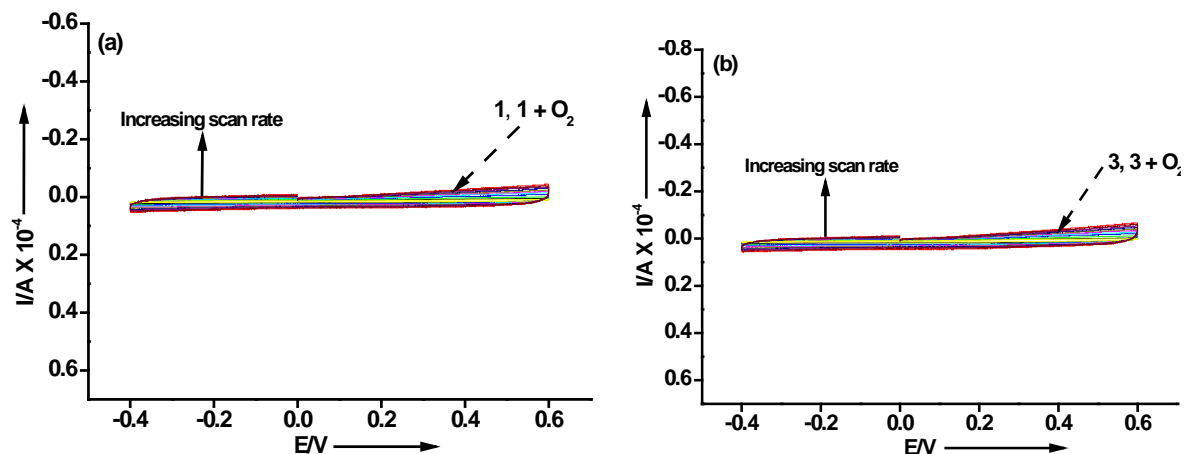

**Figure S7.** (a) Cyclic voltammograms of **1** and **3** ( $10^{-2}$  M in acetonitrile) after passing pure  $\text{O}_2$  for 10 min. Scan rate = 100-1000 mV.

## Reference

S1. L. F. Tietze, J. Looft and T. Feuerstein, *Eur. J. Org. Chem.* 2003, 2749.

S2. M. I. J. Polson, S. L. Howell, A. H. Flood, A. K. Burrell, A. G. Blackman and K. C. Gordan, *Polyhedron* 2004, **23**, 1427.
